# Supplementary material for: A high-sensitive sensor with HEPES-enhanced electrochemiluminescence of benzo[3]uril for Fe3+ and its application in human serum
Source: Royal Society of Chemistry journal article supplement (doi:10.1039/c9an02156f), 2019-12-27
Supplement: c9an02156f1.pdf [file c9an02156f1.pdf]

## Supporting Information

### **High sensitive sensor with HEPES-enhanced electrochemiluminescence of benzo[3]uril for Fe<sup>3+</sup> and its application in human serum**

Yao Lei<sup>1</sup>, Fei Qiu<sup>1</sup>, Xian-Yi Jin<sup>1,2</sup>, Jian-Mei Yang<sup>1</sup>, Mao Liu<sup>1</sup>, Qing-Mei Ge<sup>1</sup>, Hang Cong<sup>1,\*</sup>, and Zhu Tao<sup>1</sup>

<sup>1</sup>Key laboratory of macrocyclic and supramolecular chemistry of Guizhou Province, Guizhou University, Guiyang 550025, China. Email: [hcong@gzu.edu.cn](mailto:hcong@gzu.edu.cn)

<sup>2</sup>School of Materials and Metallurgical Engineering, Guizhou Institute of Technology, Guiyang 550001, China.

|                                                                                             |                                                     |     |
|---------------------------------------------------------------------------------------------|-----------------------------------------------------|-----|
| Title, authors and description of supporting information contents                           | 1/4 1/4 1/4 1/4 1/4 1/4 1/4 1/4 1/4 1/4 1/4 1/4 1/4 | S1  |
| Figure S1 <sup>1</sup> H NMR spectrum of benzo[3]uril                                       | 1/4 1/4 1/4 1/4 1/4 1/4 1/4 1/4 1/4 1/4             | S2  |
| Figure S2 <sup>13</sup> C NMR spectrum of benzo[3]uril                                      | 1/4 1/4 1/4 1/4 1/4 1/4 1/4 1/4 1/4 1/4             | S3  |
| Figure S3 HRMS spectrum of benzo[3]uril                                                     | 1/4 1/4 1/4 1/4 1/4 1/4 1/4 1/4 1/4 1/4             | S4  |
| Figure S4 Effects of electrolytes on ECL intensity                                          |                                                     | S5  |
| Figure S5 Effects of scan rates on ECL intensity                                            |                                                     | S6  |
| Figure S6. Cyclic voltammograms of benzo[3]uril and with the incubation of Fe <sup>3+</sup> |                                                     | S7  |
| Figure S7 Effects of incubation time on ECL intensity                                       |                                                     | S8  |
| Figure S8 Competitive selectivity of the ECL sensor                                         |                                                     | S9  |
| Figure S9 Competitive interferences of the ECL sensor                                       |                                                     | S10 |
| Figure S10. The reproducibility of the proposed ECL modified electrodes                     |                                                     | S11 |
| Description of the source of human serum and preparation for the Fe <sup>3+</sup> solution  |                                                     | S12 |

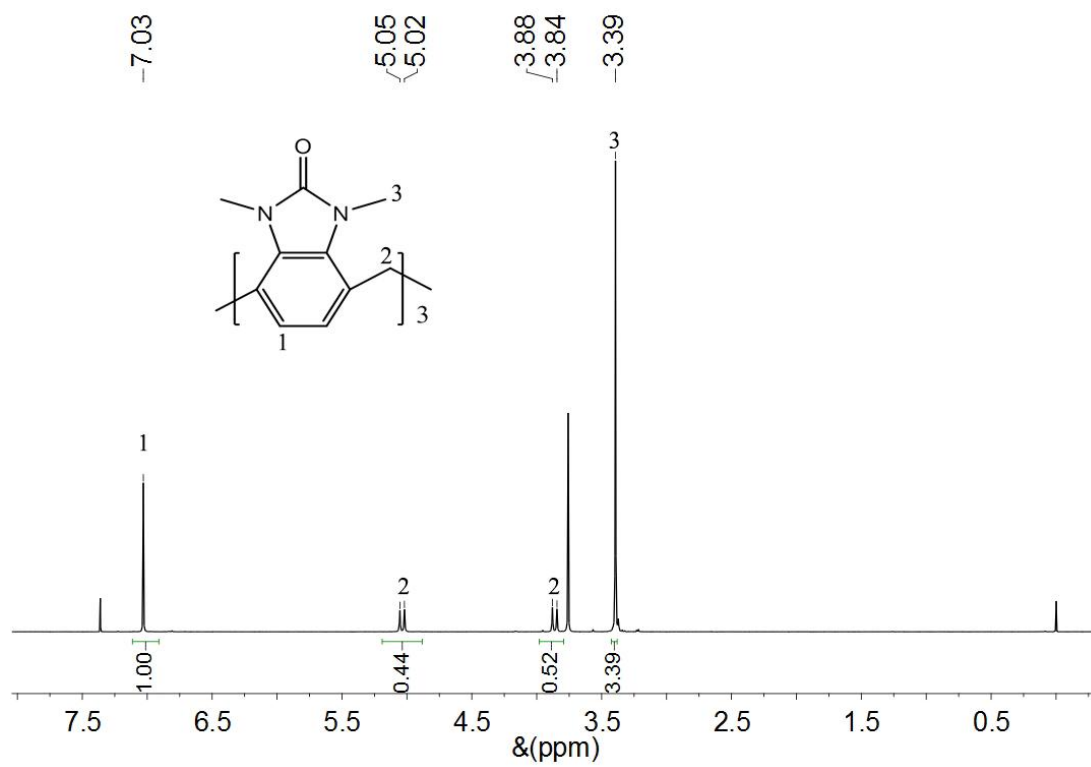

**Figure S1.**  $^1\text{H}$  NMR spectra (400 MHz,  $\text{CDCl}_3$ :  $\text{CD}_3\text{OD}$  = 6:1) of benzo[3]uril.

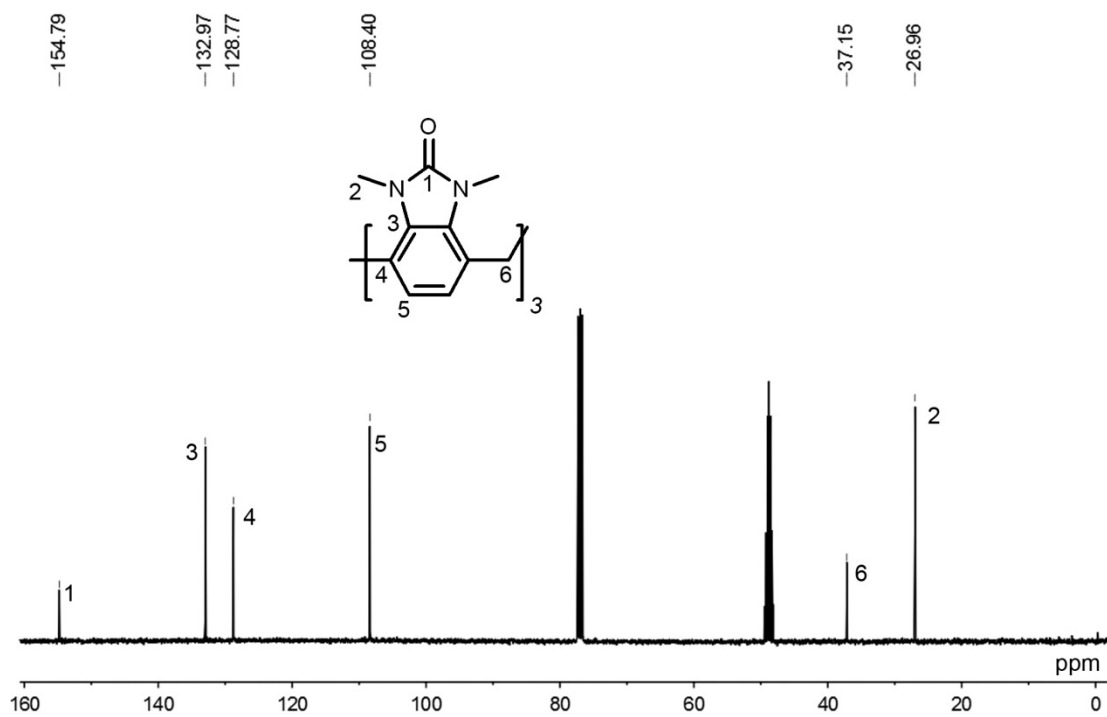

**Figure S2.**  $^{13}\text{C}$  NMR spectra (100 MHz,  $\text{CDCl}_3$ :  $\text{CD}_3\text{OD}$  = 6:1) of benzo[3]uril.

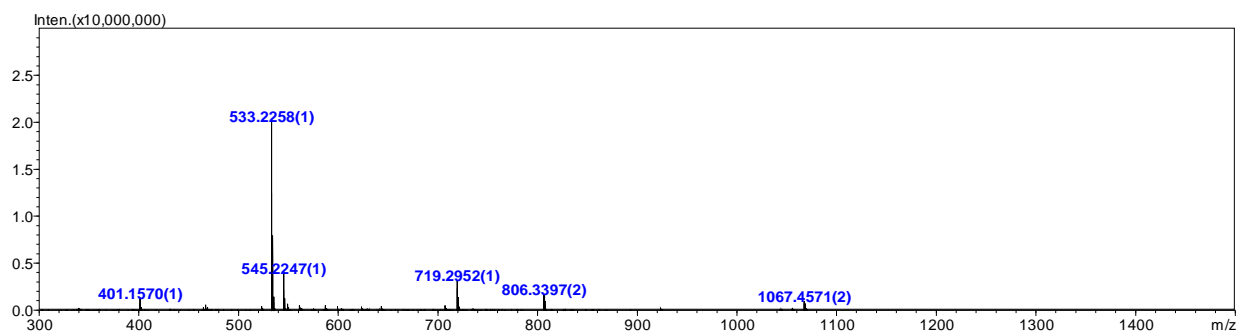

**Figure S3.** HRMS spectra of benzo[3]uril.

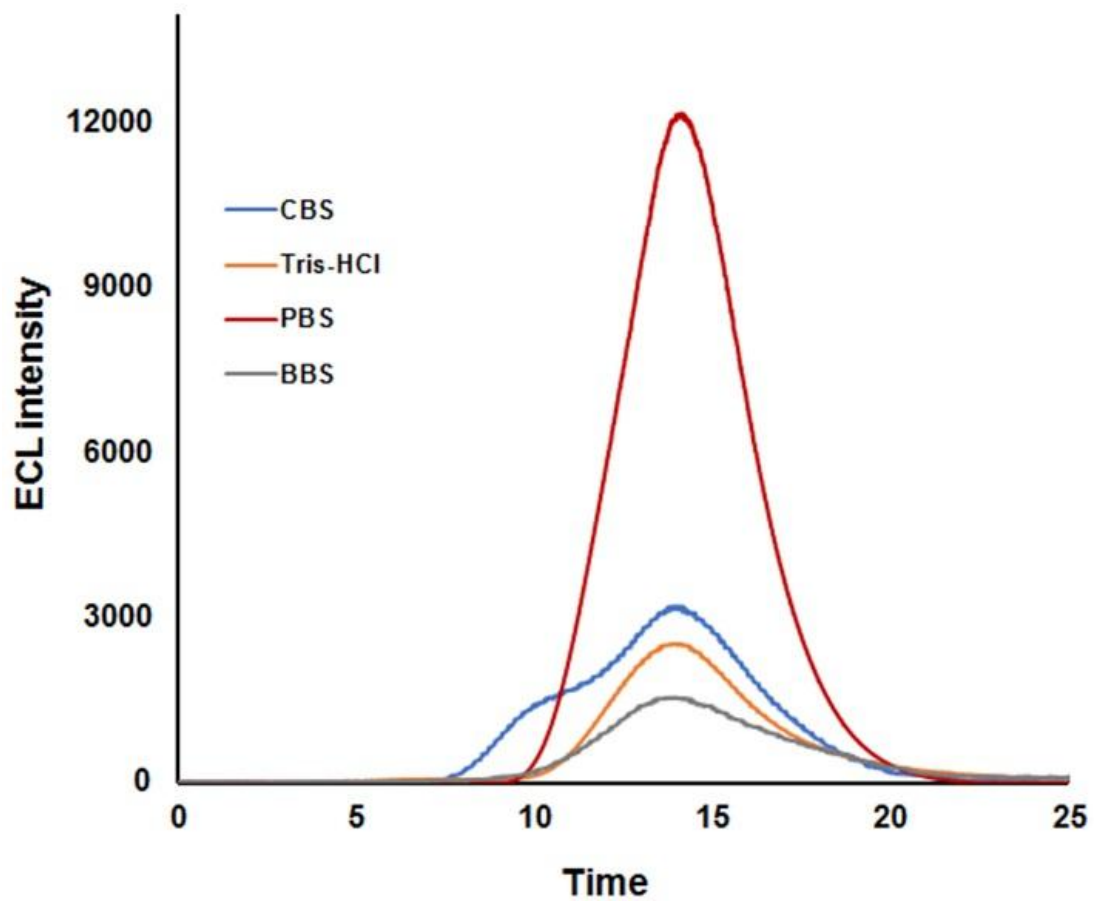

**Figure S4.** Effects of different electrolytes (0.1 M CBS, Tris-HCl, PBS, BBS, pH = 7.4), containing 0.050 M HEPES on the ECL intensity with the decorated electrode.

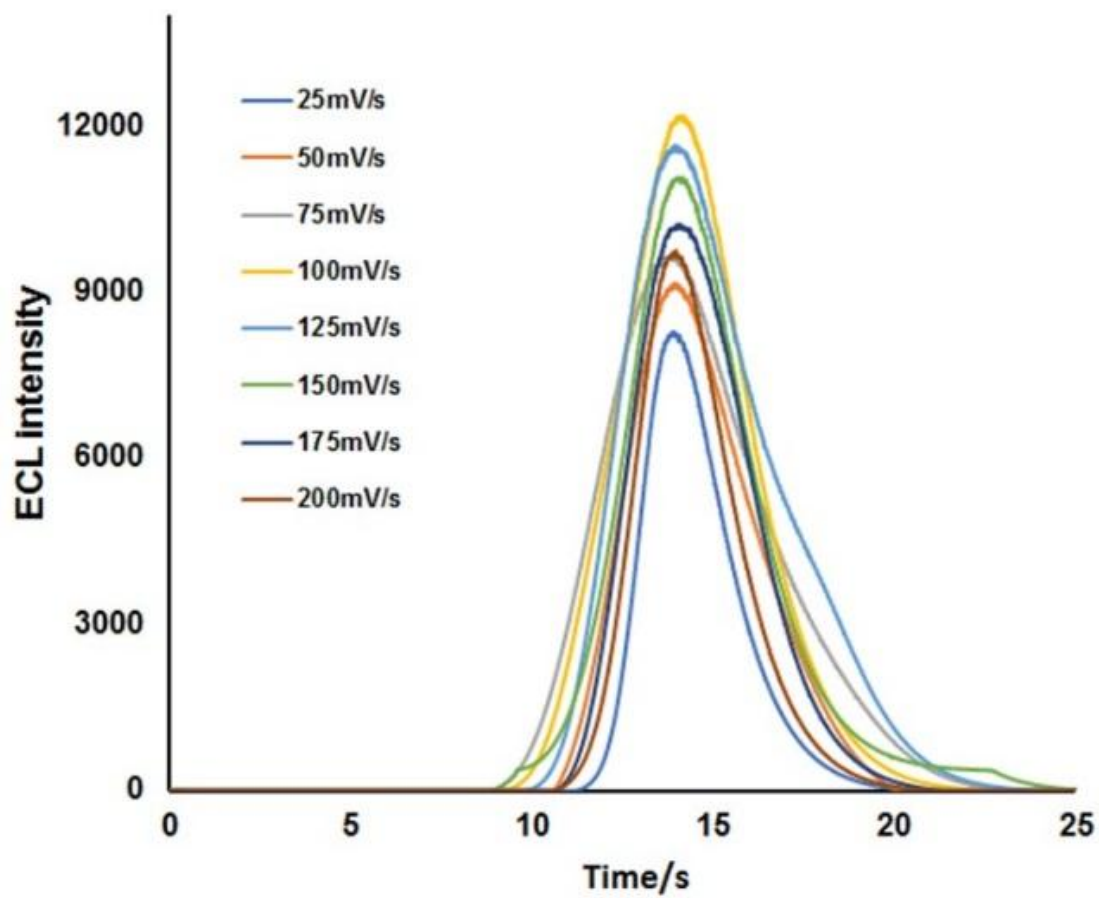

**Figure S5.** The ECL intensity of decorated electrode in the 0.1M PBS buffer (pH = 7.4) containing 0.050 M HEPES with different scan rates.

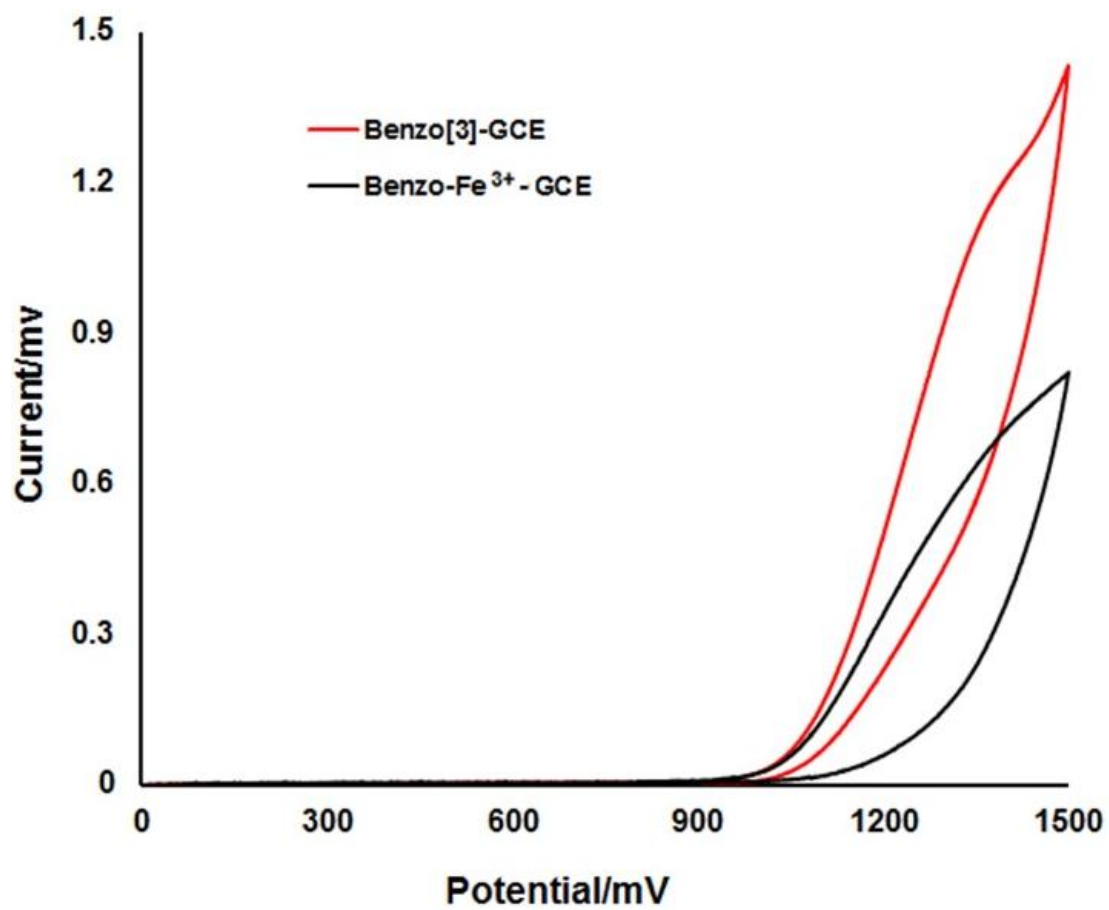

**Figure S6.** Cyclic voltammograms of benzo[3]uril and with the incubation of Fe<sup>3+</sup> in the 0.05M HEPES in the PBS solution at pH=7.4.

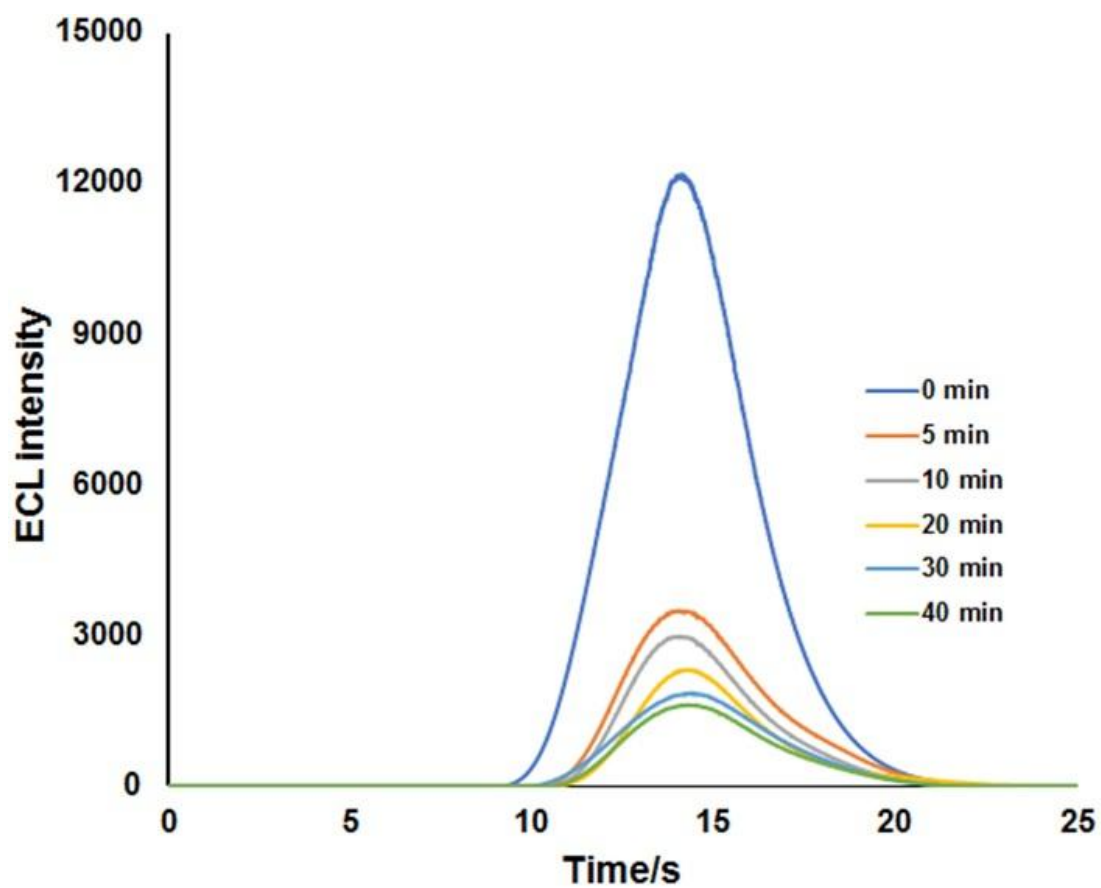

**Figure S7.** Effects of the incubation time of the decorated electrode into  $\text{Fe}^{3+}$  aqueous solution (5min, 10min, 20min, 30min, 40min) to the ECL intensity of the sensor in 0.10 M PBS (pH = 7.4) containing 0.050 M HEPES, and scan rate  $100 \text{ mV/s}^{-1}$ .



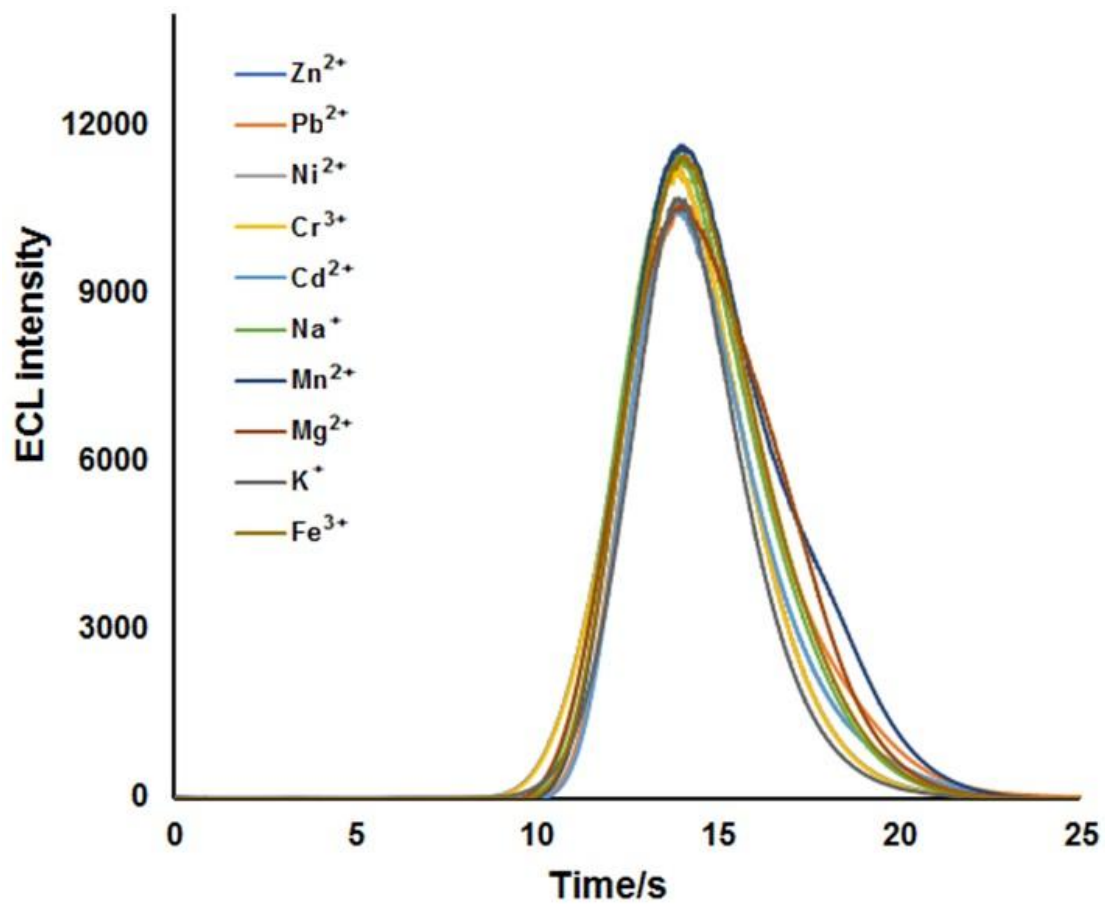

Figure S8. Competitive selectivity of the ECL sensor toward metal cations.

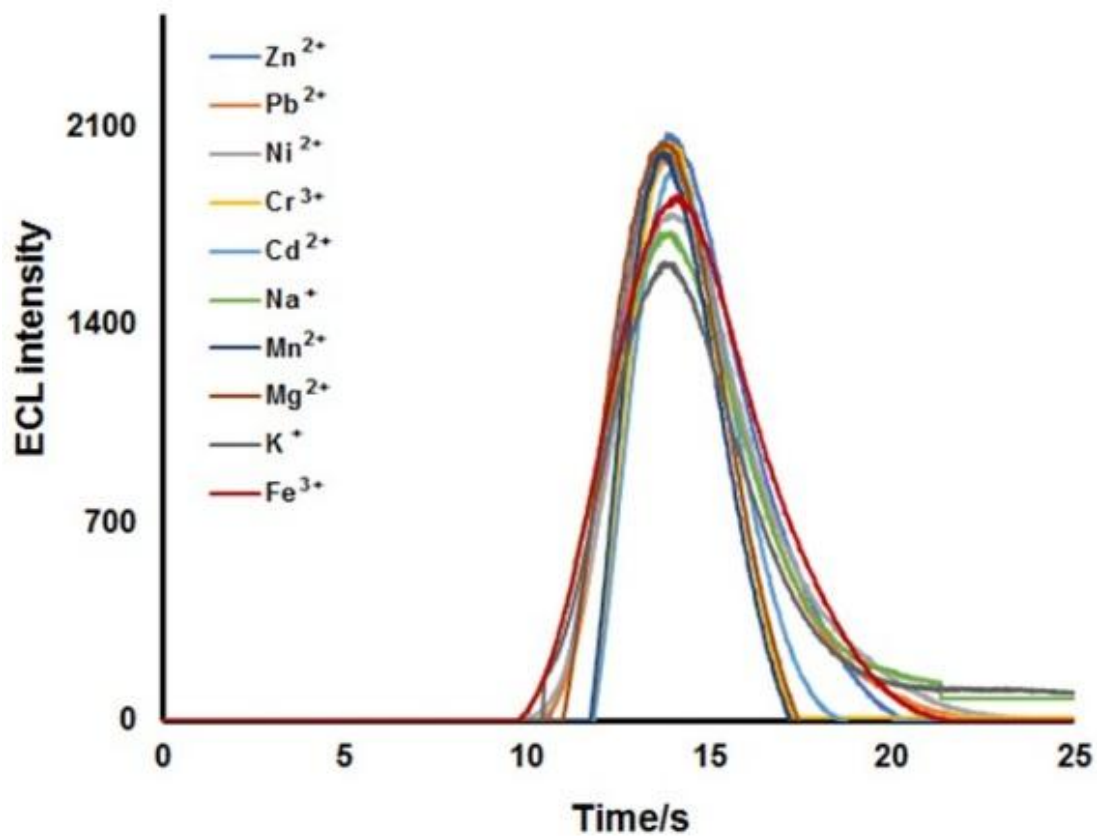

**Figure S9.** Competitive interferences of the ECL sensor toward Fe<sup>3+</sup> in the presence of other metal cations

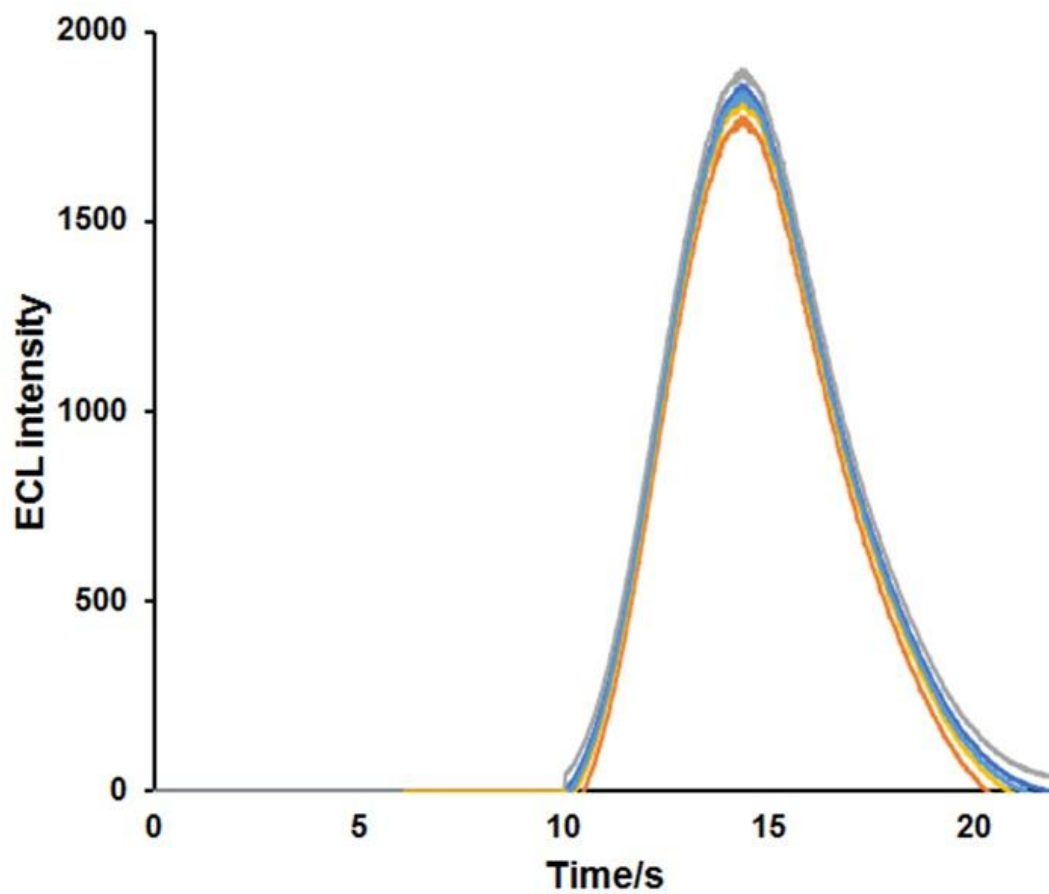

**Figure S10.** The reproducibility of the proposed ECL modified electrodes.

### **Description of the source of human serum and preparation for the Fe<sup>3+</sup> solution**

Samples of deproteinized human serum were obtained from the Hospital of Guizhou University, which was applied for analysis without any further process.

The solution of Fe<sup>3+</sup> was prepared by deionized water without acidification, and we did not observe the formation of any deposits by hydrolysis of the metal cations.
